# Supplementary material for: Wettability of Quartz by Ethanol, Rhamnolipid and Triton X-165 Aqueous Solutions with Regard to Its Surface Tension
Source: MDPI journal article supplement (doi:10.3390/colloids7040071), 2023-12-15
Supplement: s1 [file s1]

## *Supplementary Material*

# **Wettability of Quartz by Ethanol, Rhamnolipid and Triton X-165 Aqueous Solutions with Regard to Its Surface Tension**

**Anna Zdziennicka, Katarzyna Szymczyk and Bronisław Jańczuk \***

Department of Interfacial Phenomena, Institute of Chemical Sciences, Faculty of Chemistry, Maria Curie-Skłodowska University in Lublin, Maria Curie-Skłodowska Sq. 3, 20-031 Lublin, Poland; [anna.zdziennicka@mail.umcs.pl](mailto:anna.zdziennicka@mail.umcs.pl) (A.Z.); [katarzyna.szymczyk@mail.umcs.pl](mailto:katarzyna.szymczyk@mail.umcs.pl) (K.S.)

\* Correspondence: [broniaw.janczuk@mail.umcs.pl](mailto:broniaw.janczuk@mail.umcs.pl)

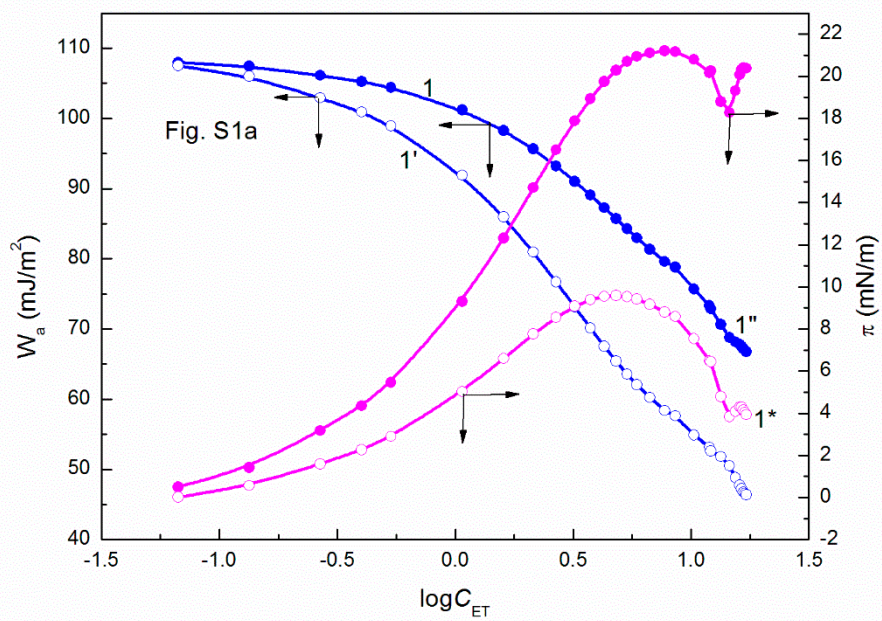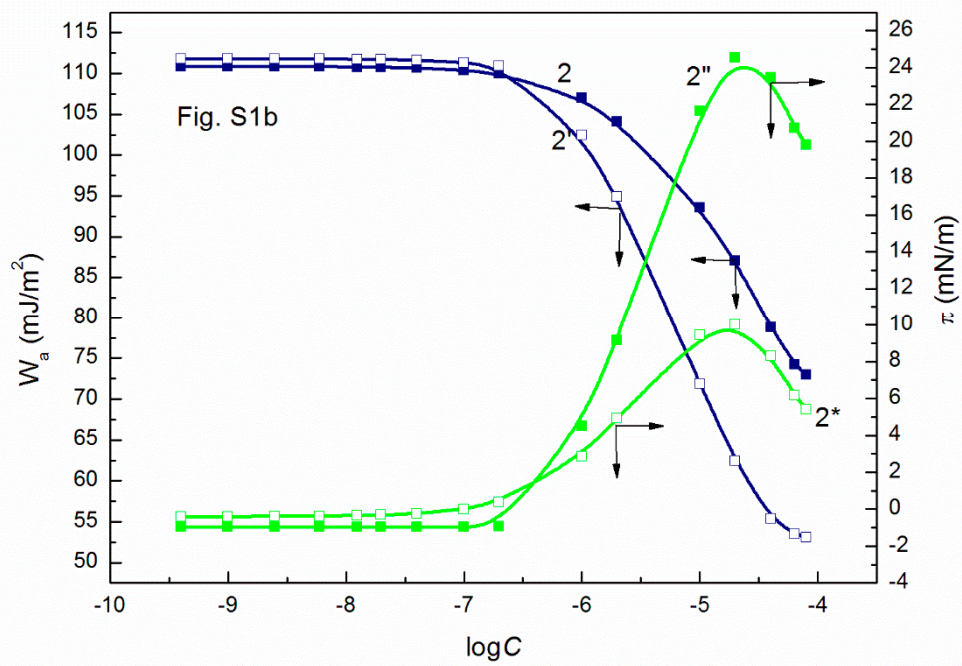

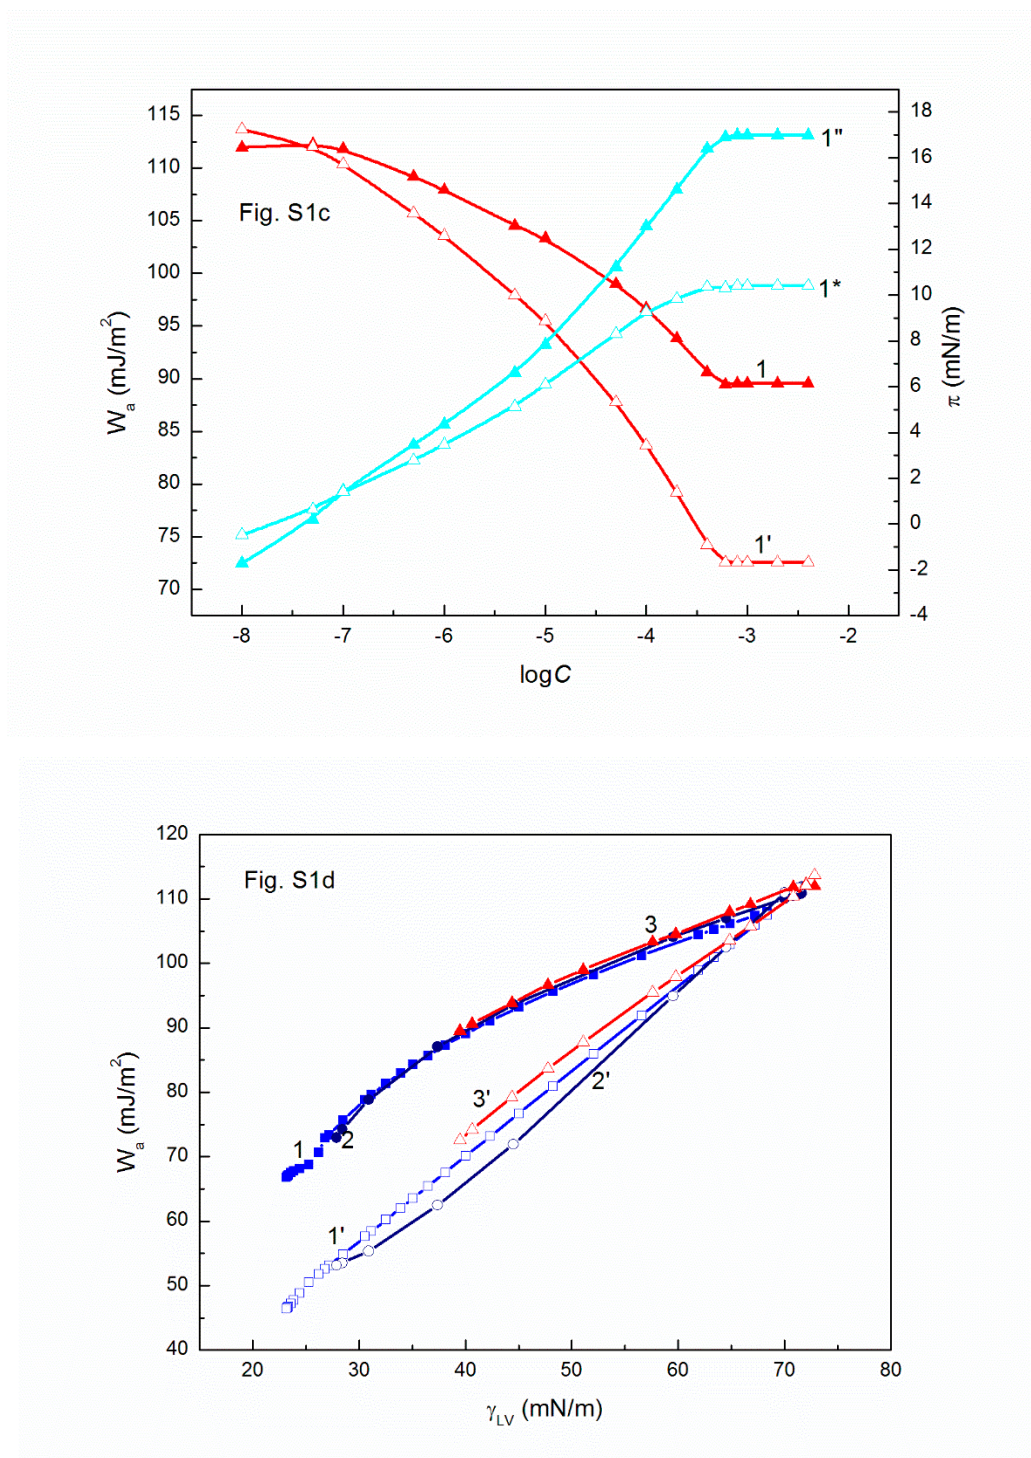

Figure S1. A plot of the adhesion work ( $W_a$ ) of the aqueous solution of ET (1a, curves 1, 1'), RL (1b, curves 2, 2'), TX165 (1c, curves 3, 3') and the film pressure ( $\pi$ ) (curves 1'', 1\*, 2'', 2\*, 3'' and 3\*) vs. the logarithm of their concentration ( $\log C$ ) as well as adhesion work ( $W_a$ ) of solution vs. its surface tension ( $\gamma_{LV}$ ) (1d). Curves 1 – 3 and 1' – 3' correspond to  $W_a$  calculated based on the van Oss et al. and Young-Dupre equations, respectively. Curves 1'' – 3'' and 1\* - 3\* correspond to the  $\pi$  value at the Q-A and Q-S interfaces, respectively.



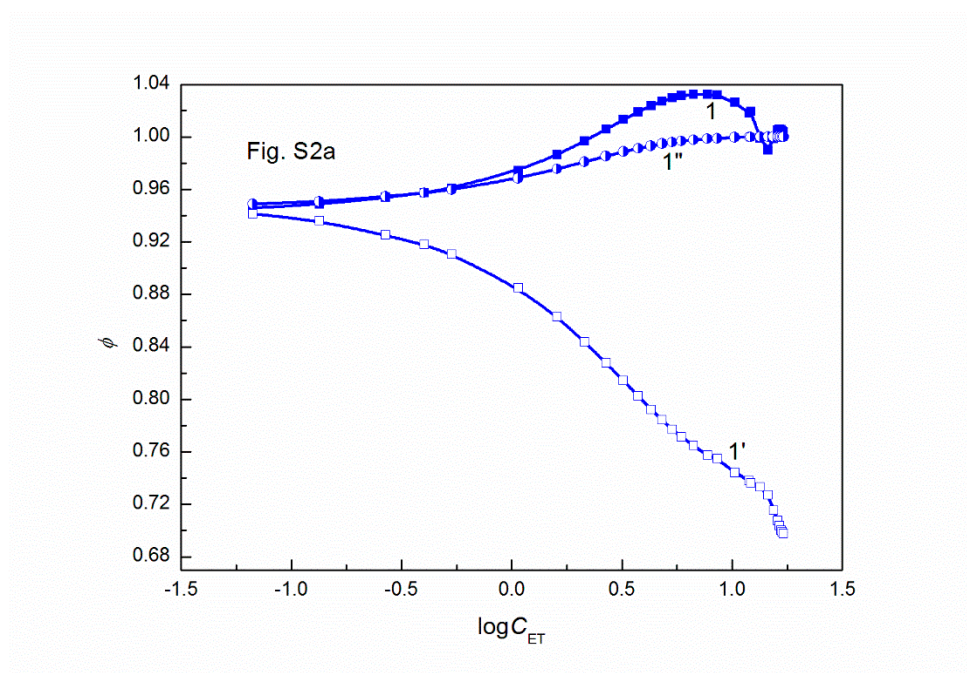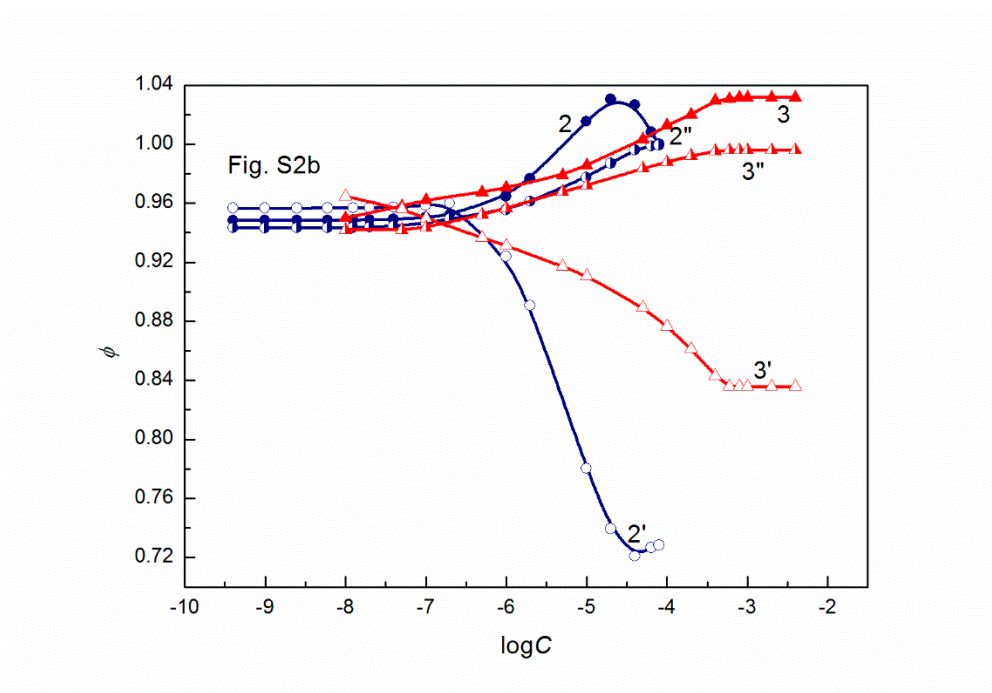

Figure S2. A plot of the  $\phi$  parameter for the aqueous solution of ET (2a, curves 1 – 1''), RL (2b, curves 2 – 2'') and TX165 (2b, curves 3 – 3'') vs. the logarithm of their concentration ( $\log C$ ). Curves 1 – 3 correspond to the values calculated from Equation (10), curves 1' – 3' to the values calculated from Equation (7) and curves 1'' – 3'' to the values calculated from Equation (2), respectively.

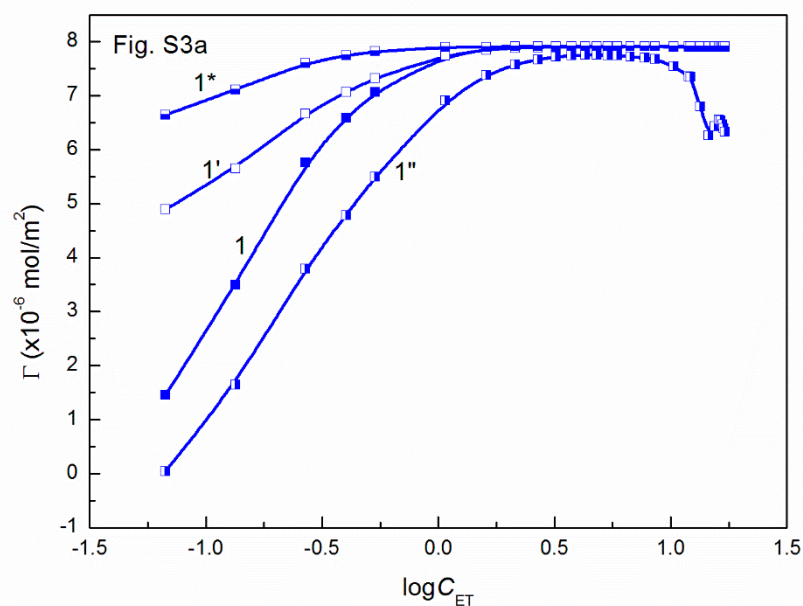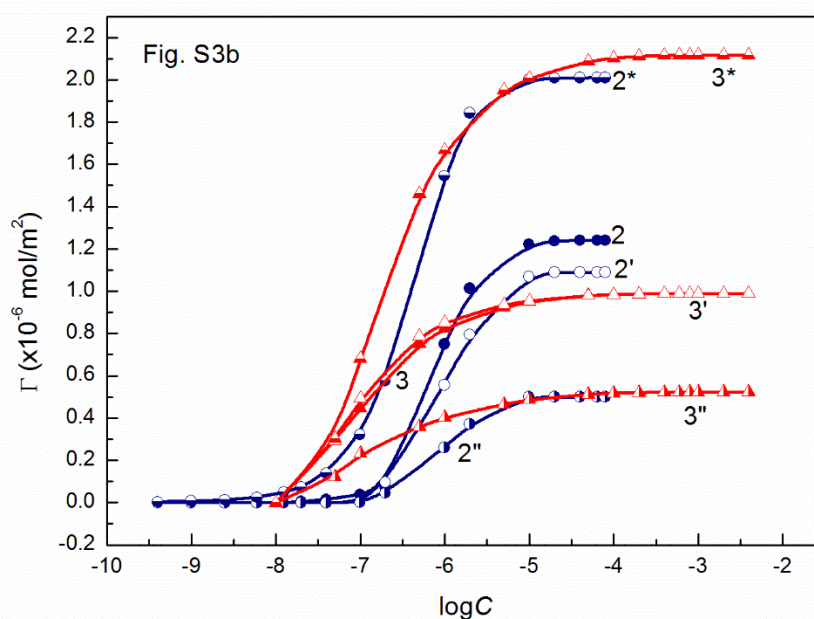

Figure S3. A plot of the surface concentration ( $\Gamma$ ) calculated from the Frumkin equation for the aqueous solution of ET (2a, curves 1 – 1\*), RL (2b, curves 2 – 2\*) and TX165 (2b, curves 3 – 3\*) vs. the logarithm of their concentration ( $\log C$ ). Curves 1 – 3 at the Q-A interface based on  $\pi = \Delta W_a$ , curves 1' – 3' at the Q-A interface based on  $\pi = \Delta \gamma_{SV}$ , curves 1'' – 3'' at the Q-S interface, curves 1\* – 3\* at the S-A interface.

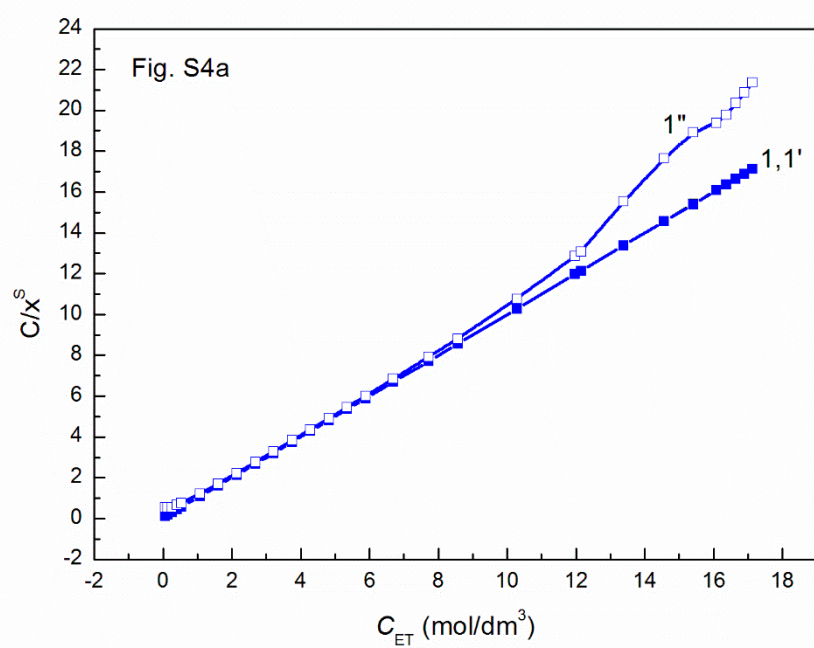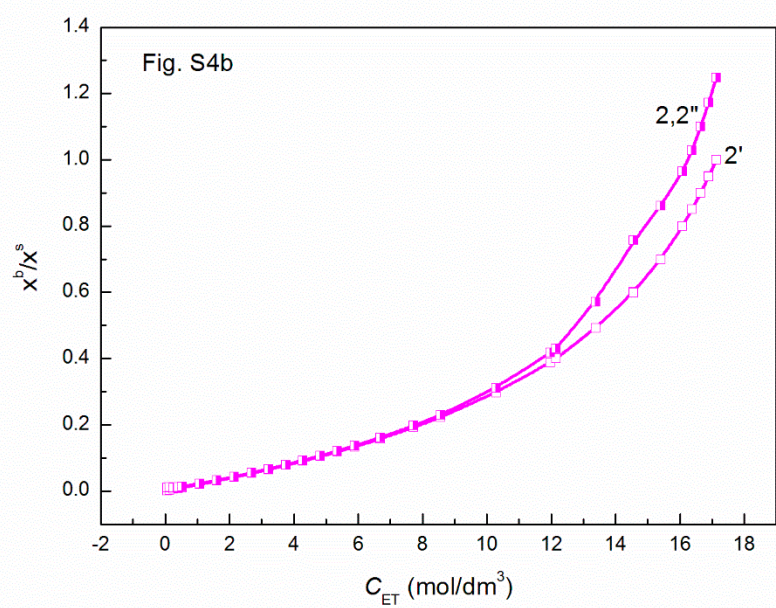



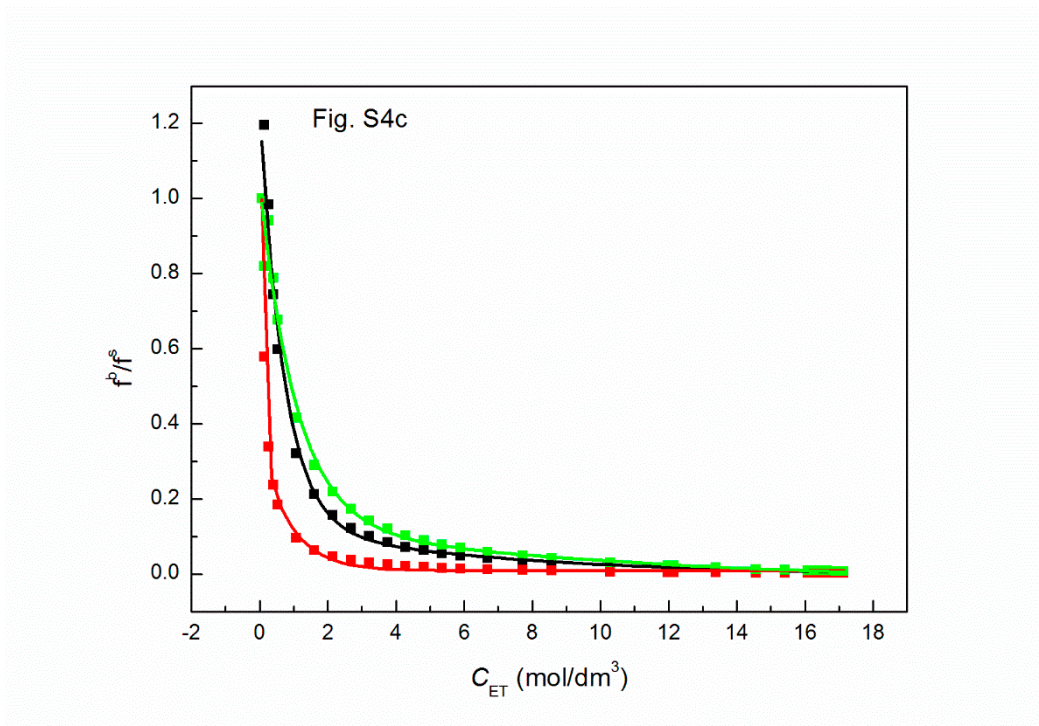

Figure S4. A plot of the values of  $\frac{c}{x^s}$  (4a, curves 1 – 1''),  $\frac{x^b}{x^s}$  (4b, curves 2 – 2'') and  $\frac{f^b}{f^s}$  (4c, curves 3 – 3'') for the aqueous solution of ET vs. its concentration ( $C_{ET}$ ). The values of  $x^s$  calculated from Equation (19) at the Q-A (curves 1, 1', 2, 2', 3 and 3') and Q-S (curves 1'' – 3'') interfaces, respectively.

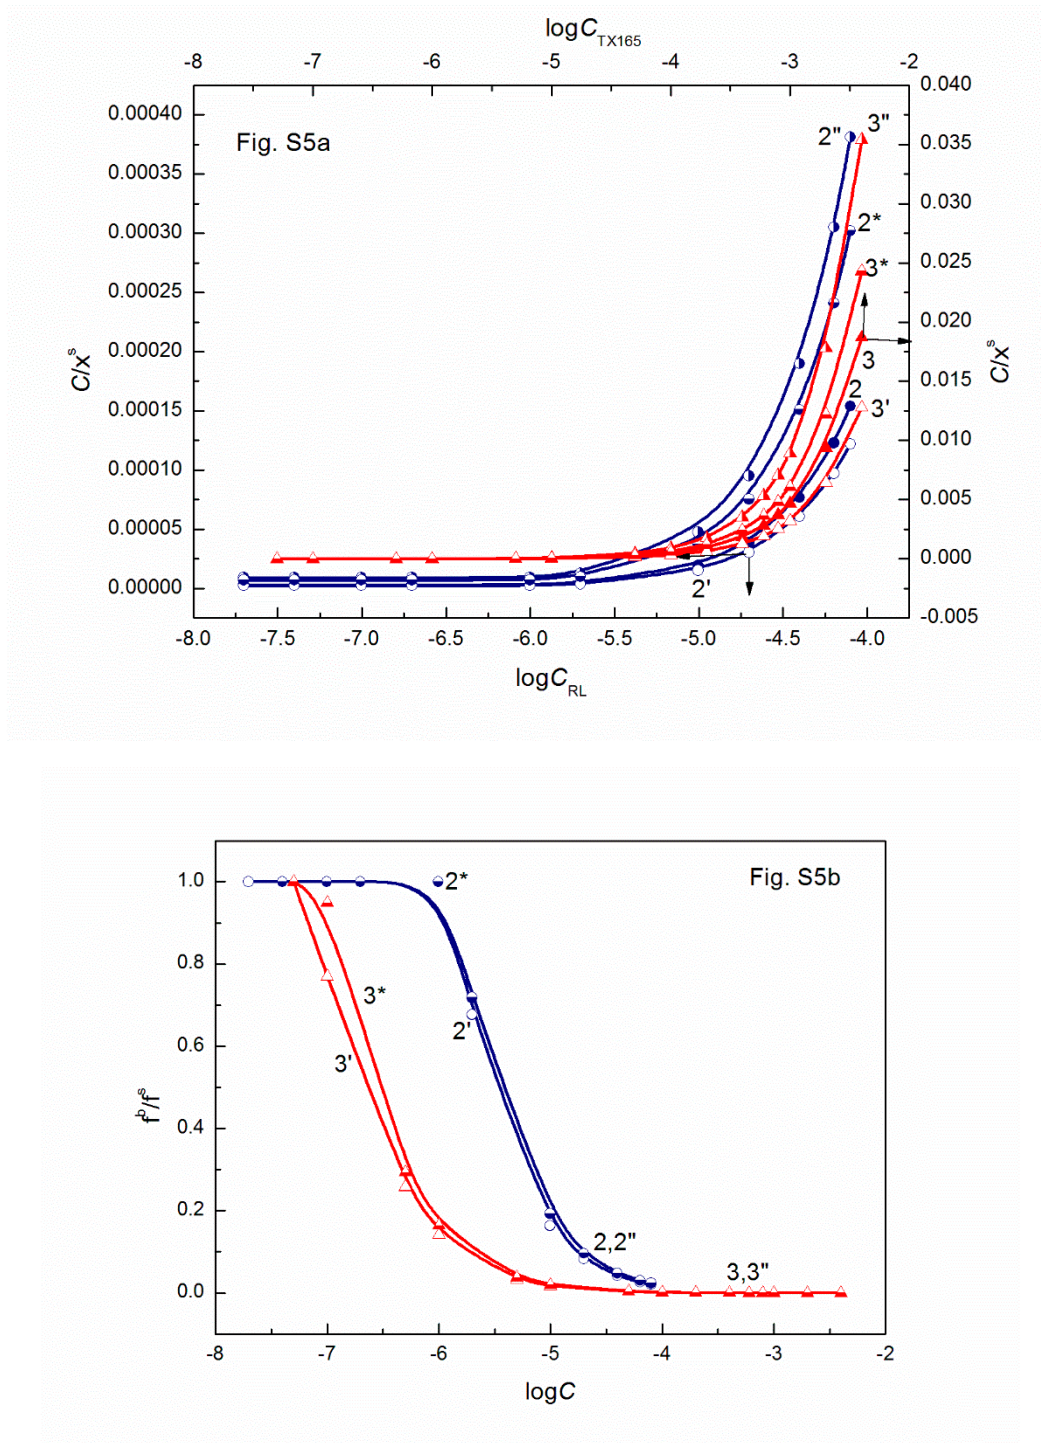

Figure S5. A plot of the values of  $\frac{C}{x^s}$  (5a) and  $\frac{f^b}{f^s}$  (5b) for RL (curves 2 – 2\*) and TX165 (curves 3 – 3\*) vs. the logarithm of their concentration ( $\log C$ ).  $x^s$  calculated from Equation (19) at the Q-A (curves 1, 1', 2, 2', 3 and 3') and Q-S (curves 1'' – 3'') interfaces, respectively for different values of  $A_0$ .



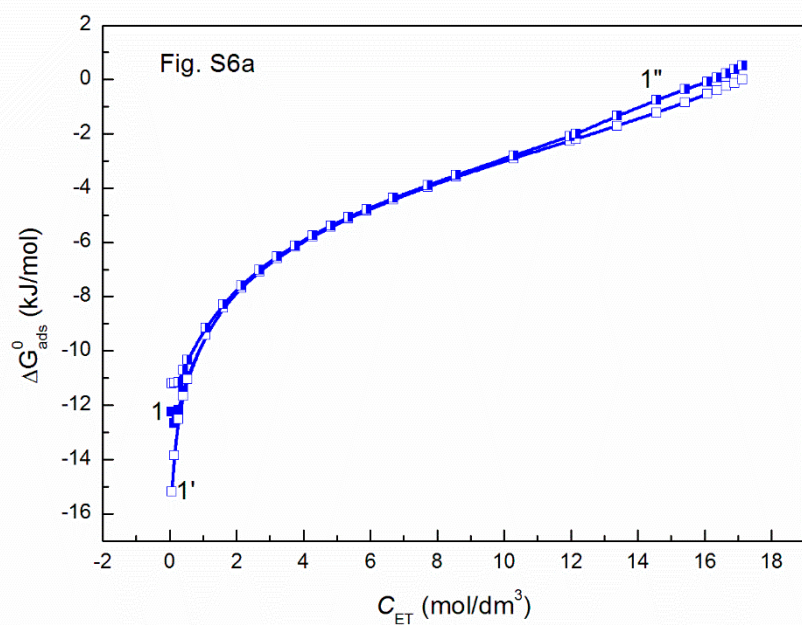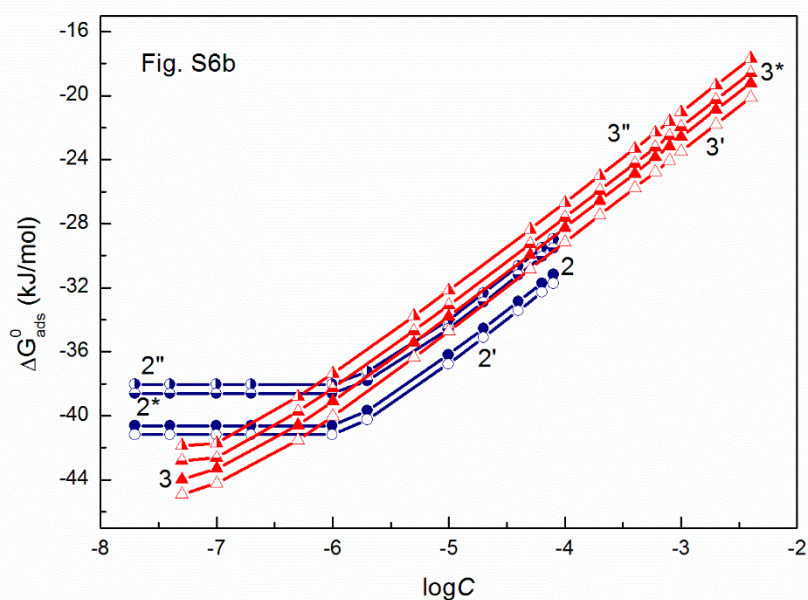

Figure S6. A plot of the Gibbs standard free energy of adsorption ( $\Delta G_{ads}^0$ ) calculated from Equation (17) for ET (6a, curves 1 – 1'') vs. its concentration ( $C_{ET}$ ) as well as for RL (6b, curves 2 – 2\*) and TX165 (6b, curves 3 – 3\*) vs. the logarithm of their concentration ( $\log C$ ). For RL and TX165 different values of  $A_0$  were used.
